# Supplementary material for: Asymmetric magnetic nanosnowman loaded with AgPd nanocage toward NIR-enhanced catalytic activity
Source: Royal Society of Chemistry journal article supplement (doi:10.1039/d4dt02425g), 2024-01-01
Supplement: d4dt02425g1.pdf [file d4dt02425g1.pdf]

## **Asymmetric Magnetic Nanosnowman Loaded with AgPd Nanocage Toward NIR-enhanced Catalytic Activity**

Jie Jin<sup>a,\*</sup>, Haoran Li<sup>a</sup>, Hongfa Wang<sup>b</sup>, Qunling Fang<sup>c,\*</sup>, Yunqi Xu<sup>b</sup>, Weili Kong<sup>a</sup>, Xia Chen<sup>a</sup>, Ken Cham-Fai Leung<sup>d</sup>, Hailong Wang<sup>b,\*</sup>, Shouhu Xuan<sup>b</sup>

*<sup>a</sup> School of Materials and Chemical Engineering, Anhui Jianzhu University, Hefei,  
230601, PR China*

*<sup>b</sup> CAS Key Laboratory of Mechanical Behavior and Design of Materials, Department  
of Modern Mechanics, University of Science and Technology of China, Hefei, 230026,  
PR China*

*<sup>c</sup> School of Food and Biological Engineering, Hefei University of Technology, Hefei,  
230009, PR China*

*<sup>d</sup> State Key Laboratory of Environmental and Biological Analysis, Department of  
Chemistry, Hong Kong Baptist University, Kowloon, Hong Kong Special  
Administrative Region of China*

\*Corresponding author:

Asso. Prof. Jie Jin

E-mail: jinjie@ahjzu.edu.cn

Asso. Prof. Qunling Fang

E-mail: fql.good@hfut.edu.cn

Prof. Hailong Wang

E-mail: hailwang@ustc.edu.cn

## Experimental section

### Materials

Iron (III) chloride hexahydrate ( $\text{FeCl}_3 \cdot 6\text{H}_2\text{O}$ ), Poly(acrylic acid) (PAA,  $\sim 2000$ ), Sodium citrate ( $\text{C}_6\text{H}_5\text{Na}_3\text{O}_7 \cdot 2\text{H}_2\text{O}$ ), Ethanol (EtOH), Urea ( $\text{H}_2\text{NCONH}_2$ ), Silver nitrate ( $\text{AgNO}_3$ ), Ammonium hydroxide ( $\text{NH}_3 \cdot \text{H}_2\text{O}$ ), Palladium (II) chloride ( $\text{PdCl}_2$ ), Sodium borohydride ( $\text{NaBH}_4$ ), 3-Hydroxytyrosine hydrochloride (DA-HCl), Trihydroxymethyl aminomethane (Tris-HCl), Glacial acetic acid ( $\text{C}_2\text{H}_4\text{O}_2$ ) 4-nitrophenol ( $\text{C}_6\text{H}_5\text{NO}_3$ ), Methylene Blue trihydrate ( $\text{C}_{16}\text{H}_{18}\text{ClN}_3\text{S} \cdot 3\text{H}_2\text{O}$ ), Methyl orange ( $\text{CHN}_3\text{SO}_3\text{Na}$ ) and N,N-Dimethylformamide (DMF,  $\text{C}_3\text{H}_7\text{NO}$ ) were purchased from Sinopharm Chemical Reagent Co., Ltd. Ethylene glycol (EG,  $(\text{CH}_2\text{OH})_2$ ), Polyvinylpyrrolidone (PVP,  $(\text{C}_6\text{H}_9\text{NO})_n$ ), Iodobenzene ( $\text{C}_6\text{H}_5\text{I}$ ), 4-Iodotoluene ( $\text{C}_7\text{H}_7\text{I}$ ), 4-Iodophenetole ( $\text{C}_8\text{H}_9\text{IO}$ ), 4-Iodoanisole ( $\text{IC}_6\text{H}_4\text{OCH}_3$ ), Bromobenzene ( $\text{C}_6\text{H}_5\text{Br}$ ), Chlorobenzene ( $\text{C}_6\text{H}_5\text{Cl}$ ), Methyl acrylate ( $\text{C}_4\text{H}_6\text{O}_2$ ), Triethylamine ( $\text{C}_6\text{H}_{15}\text{N}$ ) and Dichloromethane ( $\text{CH}_2\text{Cl}_2$ ) were purchased from Aladdin Chemical Co., Ltd, China. Petroleum ether (PE,  $\text{C}_5\text{HC}_6\text{HC}_7\text{H}$ ) and Ethylacetate (EA,  $\text{C}_4\text{H}_8\text{O}_2$ ) were purchased from Macklin Biochemical Technology Co., Ltd. All reagents were used as received without further purification and ultrapure water was used in all experiments.

**Synthesis of  $\text{Fe}_3\text{O}_4@Ag/PDA$  nanospheres:** First, 15 mg  $\text{Fe}_3\text{O}_4$  nanospheres were dispersed in 50 mL of ethanol using ultrasonication, followed by the addition of PVP (0.1 g) and further ultrasonication for 1 h. Subsequently,  $\text{Ag}(\text{NH}_3)_2\text{OH}$  (0.5 mL,  $8.8 \times 10^{-5}$  M) was introduced under magnetic stirring. After 14 h, the reaction system was transferred to ultrasound at 35 °C. Following a 30 min interval,  $\text{NaBH}_4$  (10 mg) was added. 30 min later, the Tris-HCl buffer (25 mL, pH=8.5) mixed with dopamine (25 mg) was poured into the conical flask. After 4 h, the products were collected with a magnet and washed alternately with deionized water and ethanol. Finally, the product was obtained by vacuum drying.

**Synthesis of  $\text{Fe}_3\text{O}_4@Pd/PDA$  nanospheres:** First, 15 mg  $\text{Fe}_3\text{O}_4$  nanospheres were dispersed in 50 mL of ethanol using ultrasonication, followed by the addition of PVP (0.1 g) and further ultrasonication for 1 h. Subsequently, the mixture was stirred magnetically for 14 h. Then, the reaction system was transferred to ultrasonic waves

at 35 °C. Following a 30 min interval, NaBH<sub>4</sub> (10 mg) and H<sub>2</sub>PdCl<sub>4</sub> (0.01 M, 4.4 mL) were added. 30 min later, the Tris-HCl buffer (25 mL, pH=8.5) mixed with dopamine (25 mg) was poured into the conical flask. After 4 h, the products were collected with a magnet and washed alternately with deionized water and ethanol. Finally, the product was obtained by vacuum drying.

**Synthesis of h-Fe<sub>3</sub>O<sub>4</sub>@AgPd/PDA nanospheres, MXene@AgPd/PDA nanosheets, α-Fe<sub>2</sub>O<sub>3</sub>@AgPd@PDA nanospindles, and SiO<sub>2</sub>@AgPd/PDA nanospheres:** Firstly, h-Fe<sub>3</sub>O<sub>4</sub> nanospheres, MXene nanosheets, α-Fe<sub>2</sub>O<sub>3</sub> nanospindles, SiO<sub>2</sub> nanospheres were synthesized by literatures<sup>1-4</sup>. The subsequent synthesis methods were consistent with those of Fe<sub>3</sub>O<sub>4</sub>@AgPd/PDA nanosnowman.

### **DFT calculation details**

The density functional theory (DFT) calculation was carried out using Vienna Ab initio Simulation Package (VASP). The exchange–correlation energy functional was described by Perdew-Burke-Ernzerhof generalized gradient approximation (GGA-PBE). The projector augmented wave (PAW) pseudopotentials were used to describe the core electrons interaction. The Brillouin zone integration was performed using a grid of 4×4×1 Gamma center scheme, which was corresponded to a density of 0.04 2π/Å. The plane wave energy cutoff was set to 420 eV, while the vacuum region was set to 15 Å. The energy convergence threshold was set to 10<sup>-6</sup> eV and the force threshold was set to 0.01 eV/Å. The heterostructures were constituted of Fe<sub>3</sub>O<sub>4</sub> (110) and AgPd (111), comprising 48 Fe atoms, 64 O atoms, 12 Ag atoms, and 12 Pd atoms.

The charge density difference was calculated by the formula,

$$\Delta\rho = \rho(\text{AgPd}@Fe_3O_4) - \rho(\text{AgPd}) - \rho(Fe_3O_4) \quad (3)$$

Where the  $\rho(\text{AgPd}@Fe_3O_4)$ ,  $\rho(\text{AgPd})$ ,  $\rho(Fe_3O_4)$  were the charge density of AgPd@Fe<sub>3</sub>O<sub>4</sub>, AgPd, and Fe<sub>3</sub>O<sub>4</sub>, respectively.

### **Characterization**

Field emission transmission electron microscopy (FE-TEM, JEM-2100F) was used to observe the morphology and nanostructure of the samples. Field emission scanning electron microscopy (FE-SEM) images were obtained on a Regulus 8230 HR-FESEM.

The crystal structure of the samples was determined by X-ray diffraction (XRD, SmartLab). The surface elemental composition, chemical states, and electronic structure of the material were determined by an X-ray photoelectron spectrometer (XPS, ESCALAB250Xi). The functional groups of all samples in the range of 4000-500  $\text{cm}^{-1}$  wave number were analyzed by FT-IR (Nicolet 6700). An inductively coupled plasma-mass spectrometer (ICP-AES, iCAP 7400) was used to analyze the metal content in the products. An UV spectrophotometer (UV-1800, Shimadzu) was used to determine the absorbance of the substances during the catalytic process. A Gas chromatography-Fourier transform electrostatic field orbital trap ultra-high resolution mass spectrometer (GC-MS, Q Exactive GC) was used to separate and identify the complex components. A nuclear magnetic resonance spectrometer (AV-III 400 MHz NMR) was used to provide information about the chemical environment and bonds of atoms in a compound molecule.

### Supplementary Figures

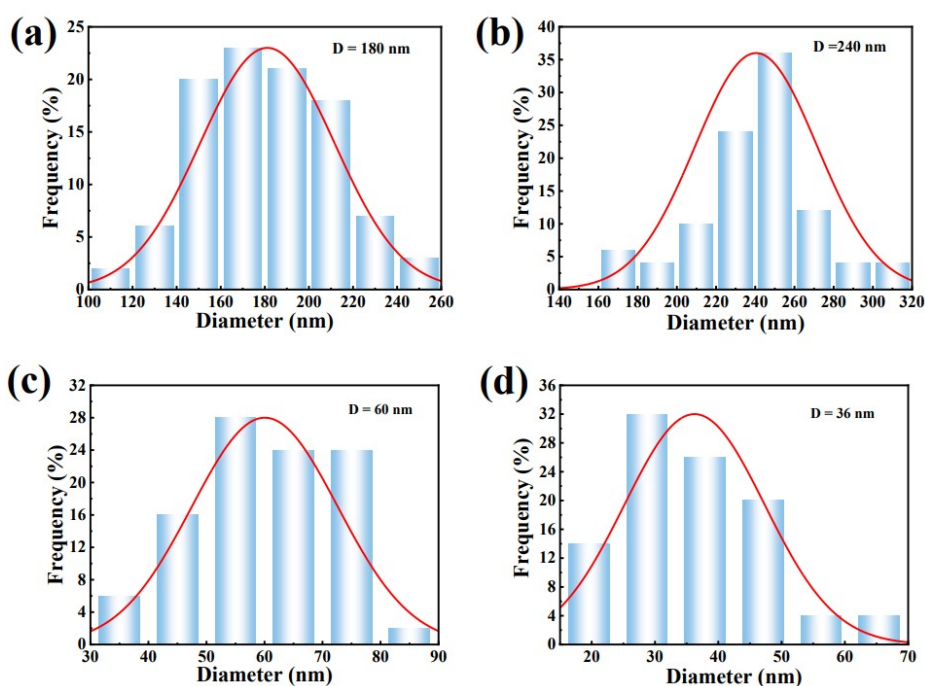

**Fig. S1** Size distribution histogram of  $\text{Fe}_3\text{O}_4$  (a), the "body" of  $\text{Fe}_3\text{O}_4@AgPd/PDA$  nanosnowman (b), the outer diameter of AgPd nanocage (c), and the inner diameter of AgPd nanocage (d).

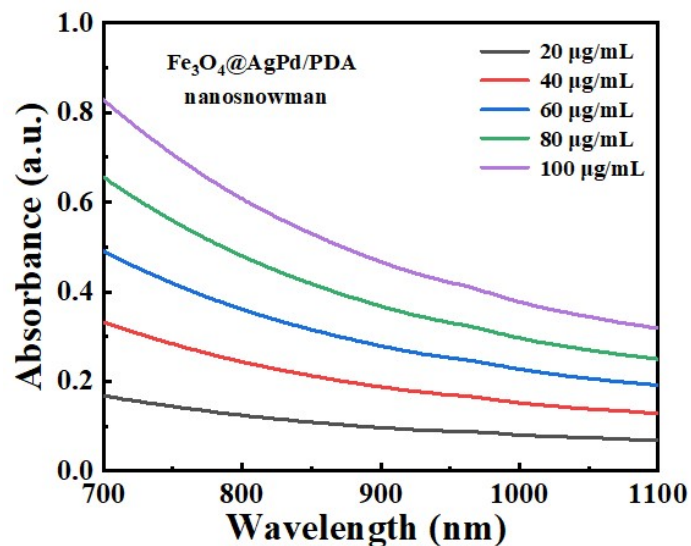

**Fig. S2** Near-infrared absorption spectra of the  $\text{Fe}_3\text{O}_4@AgPd/PDA$  nanosnowman.

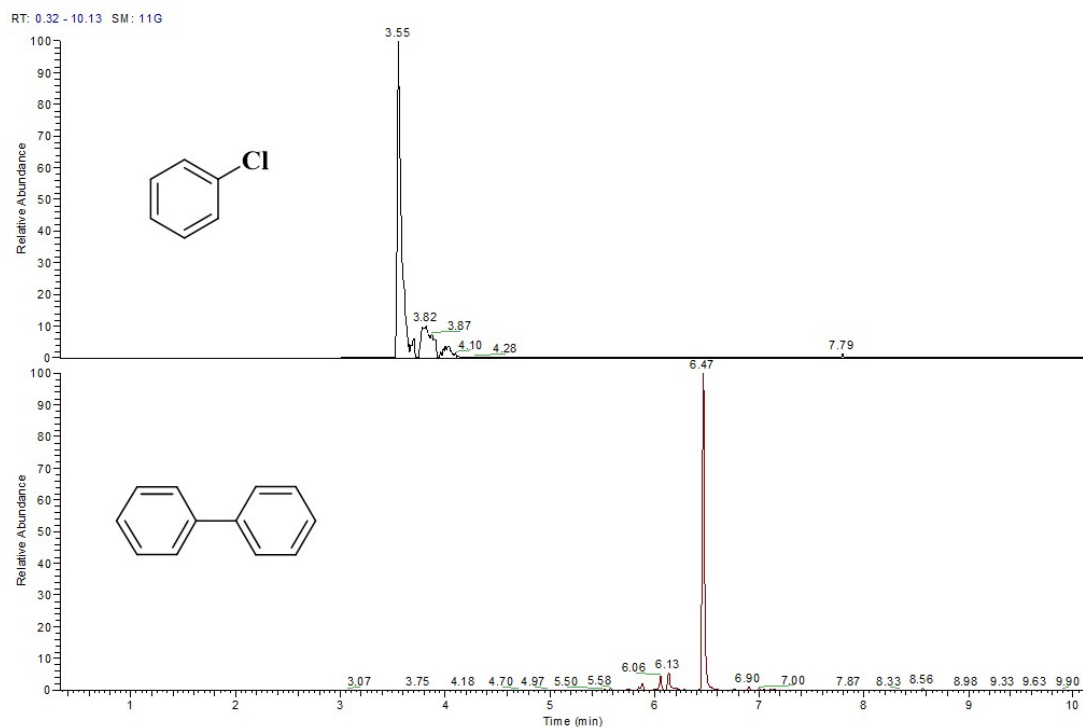

**Fig. S3** GC-MS spectra of the products obtained using  $\text{Fe}_3\text{O}_4@AgPd/PDA$  nanosnowman as a catalyst and chlorobenzene and methyl acrylate as a reaction substrate.

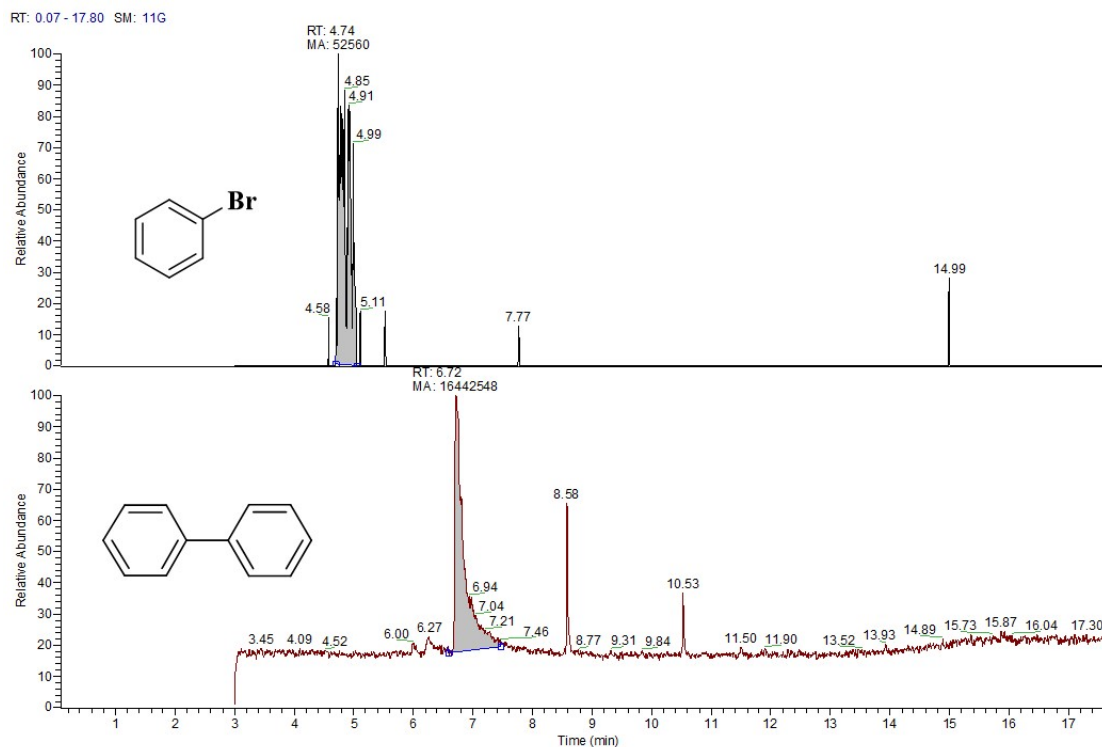

**Fig. S4** GC-MS spectra of the products obtained using  $\text{Fe}_3\text{O}_4@\text{AgPd}/\text{PDA}$  nanosnowman as a catalyst and bromobenzene and methyl acrylate as a reaction substrate.

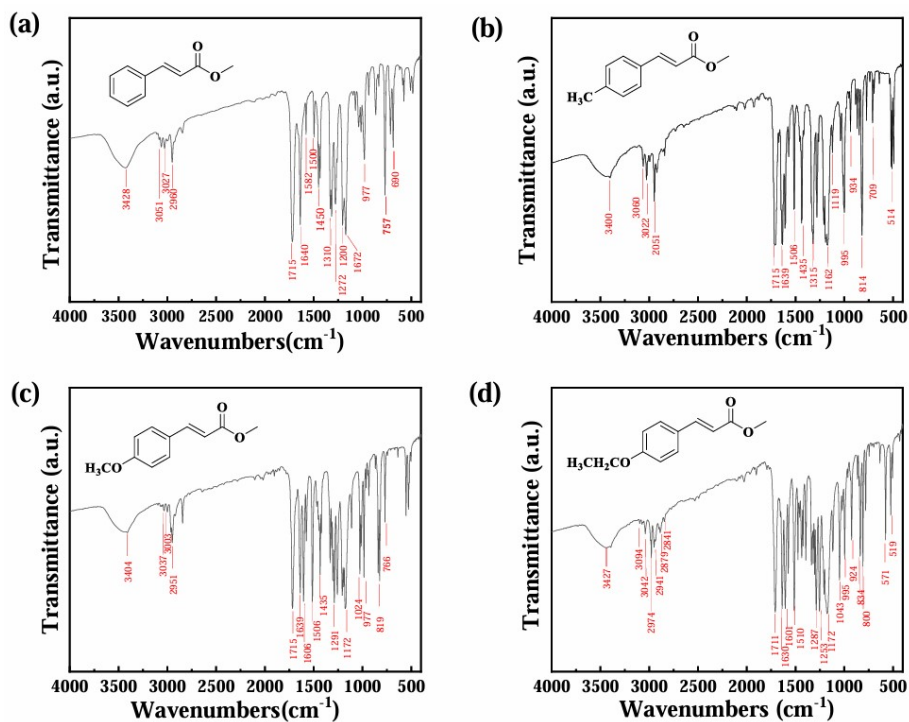

**Fig. S5** FTIR spectra of methyl cinnamate, methyl 4-methylcinnamate, methyl (*E*)-p-methoxycinnamate, and methyl 4-ethoxycinnamate.

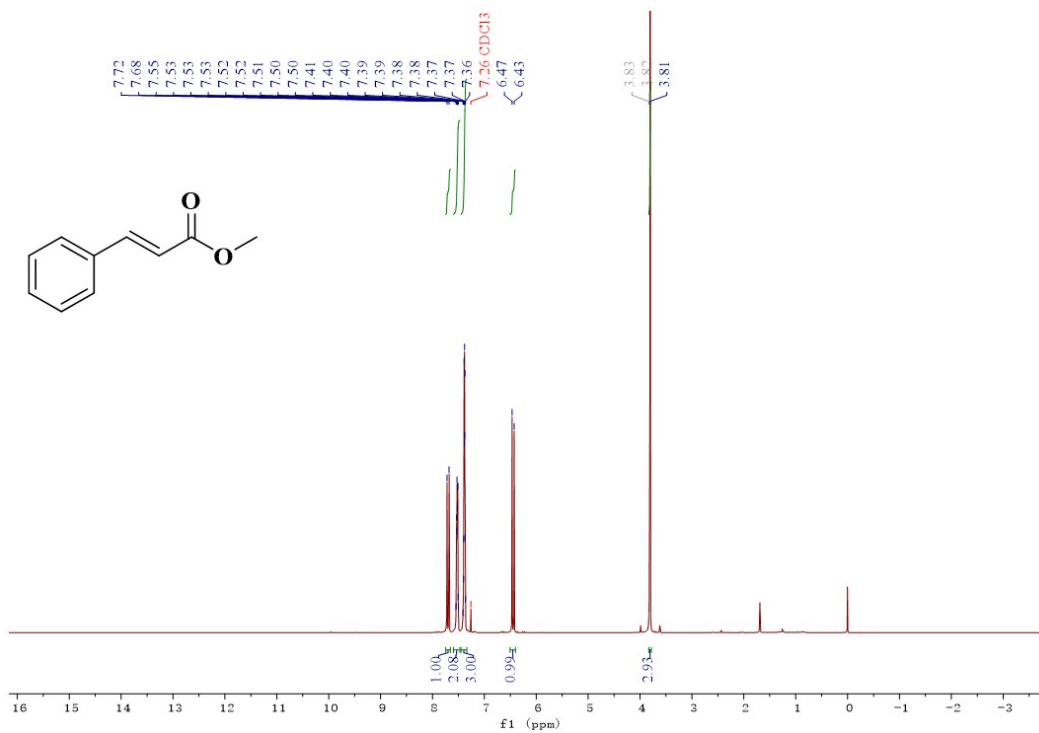

**Fig. S6** <sup>1</sup>H NMR spectra of methyl cinnamate.

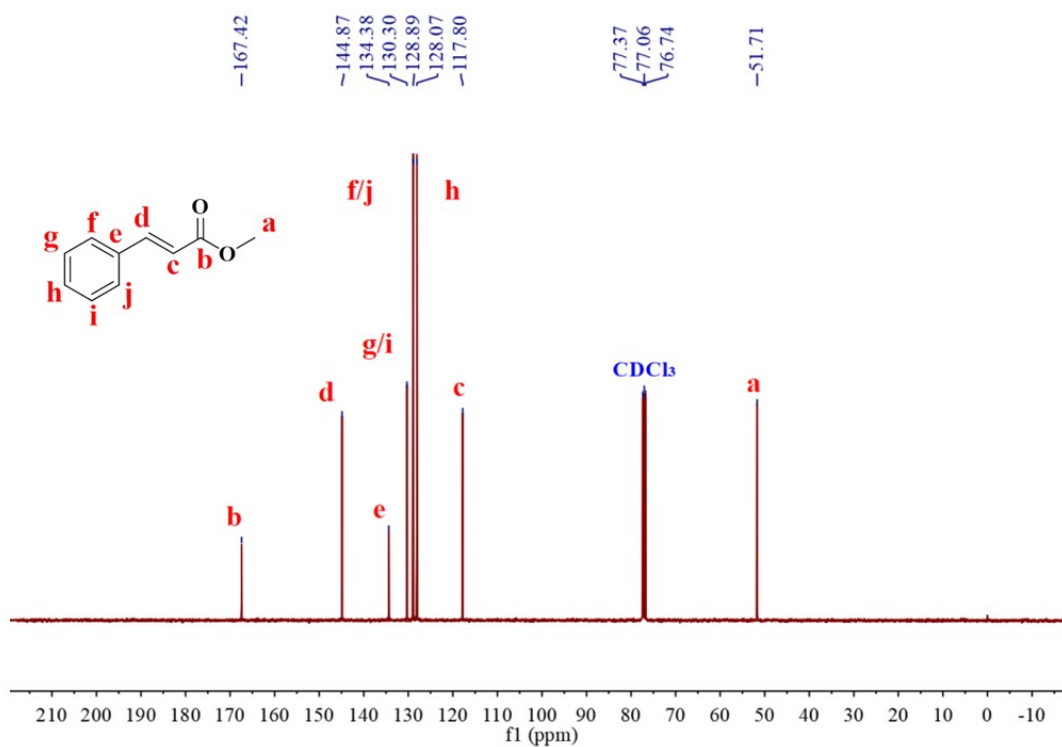

**Fig. S7** <sup>13</sup>C NMR spectra of methyl cinnamate.

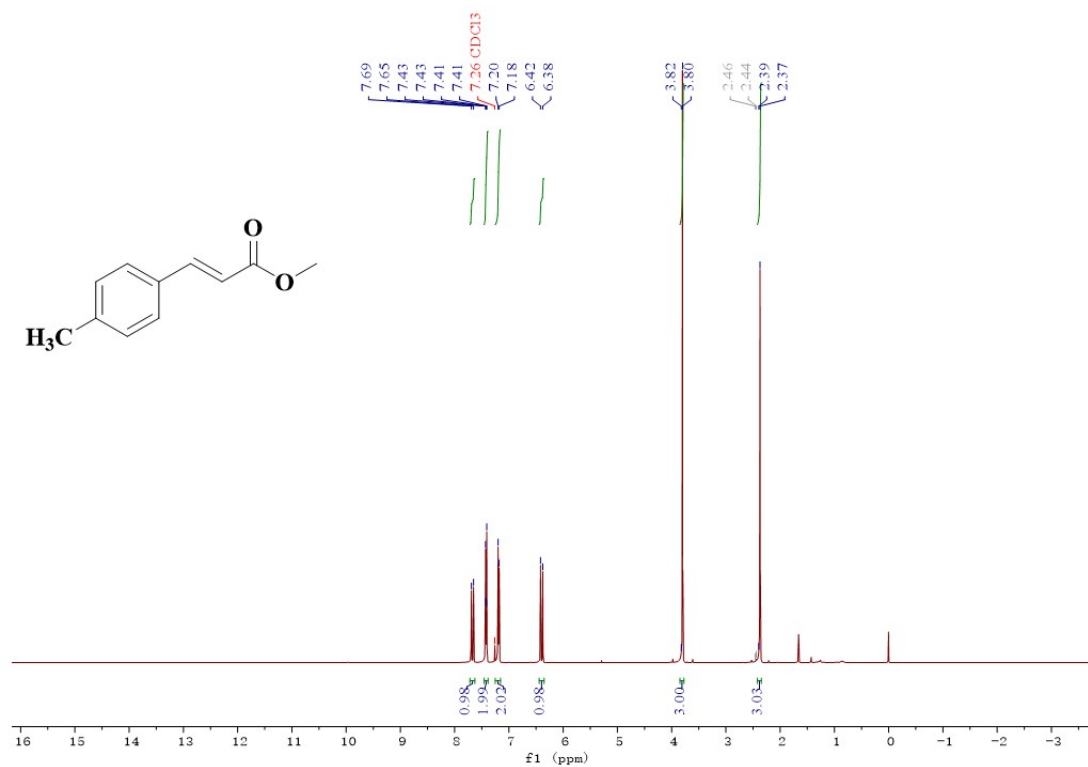

Fig. S8 <sup>1</sup>H NMR spectra of methyl 4-methylcinnamate.

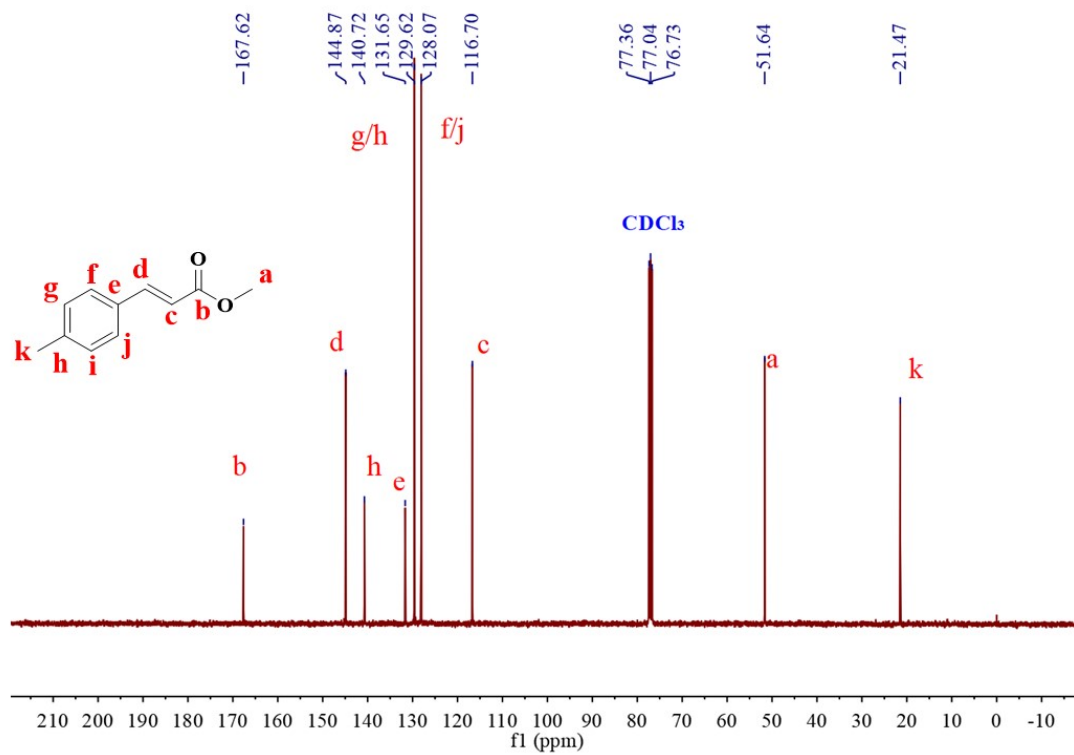

Fig. S9 <sup>13</sup>C NMR spectra of methyl 4-methylcinnamate.



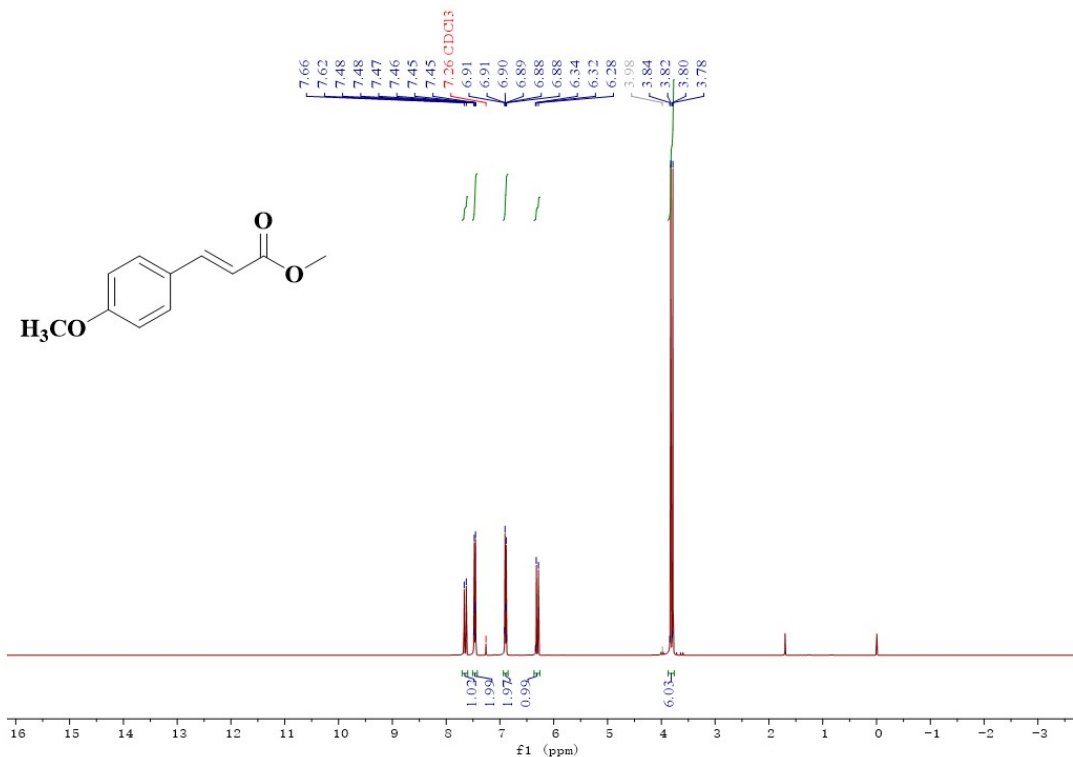

Fig. S10 <sup>1</sup>H NMR spectra of methyl (*E*)-*p*-methoxycinnamate.

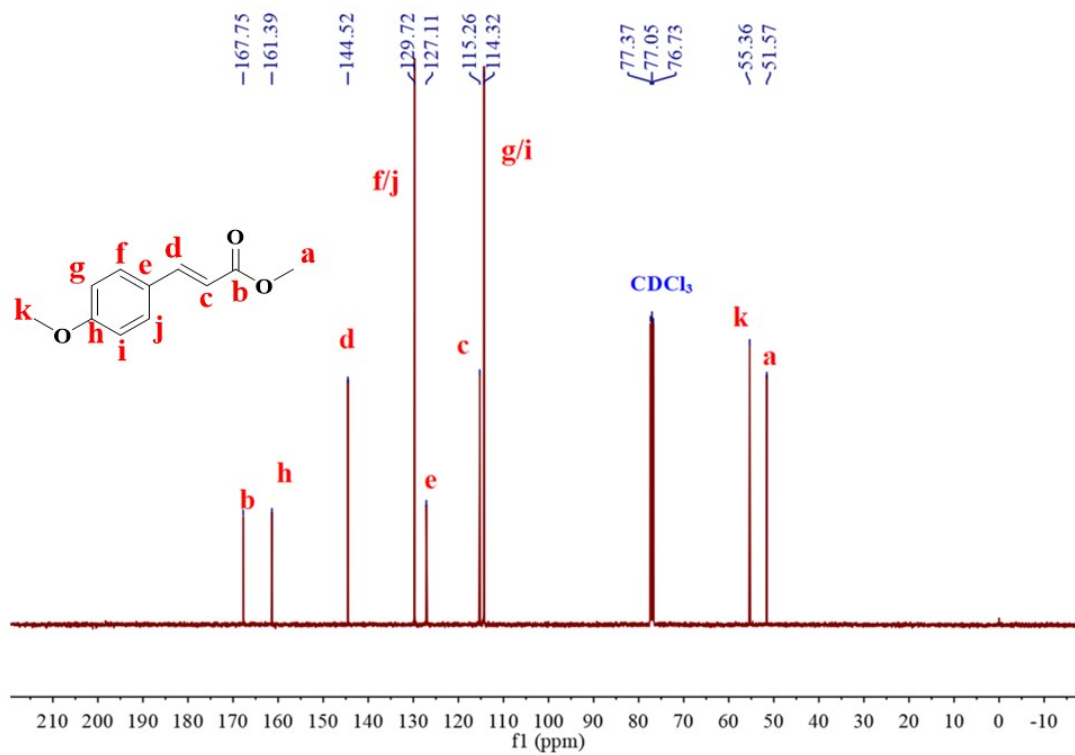

Fig. S11 <sup>13</sup>C NMR spectra of methyl (*E*)-*p*-methoxycinnamate.

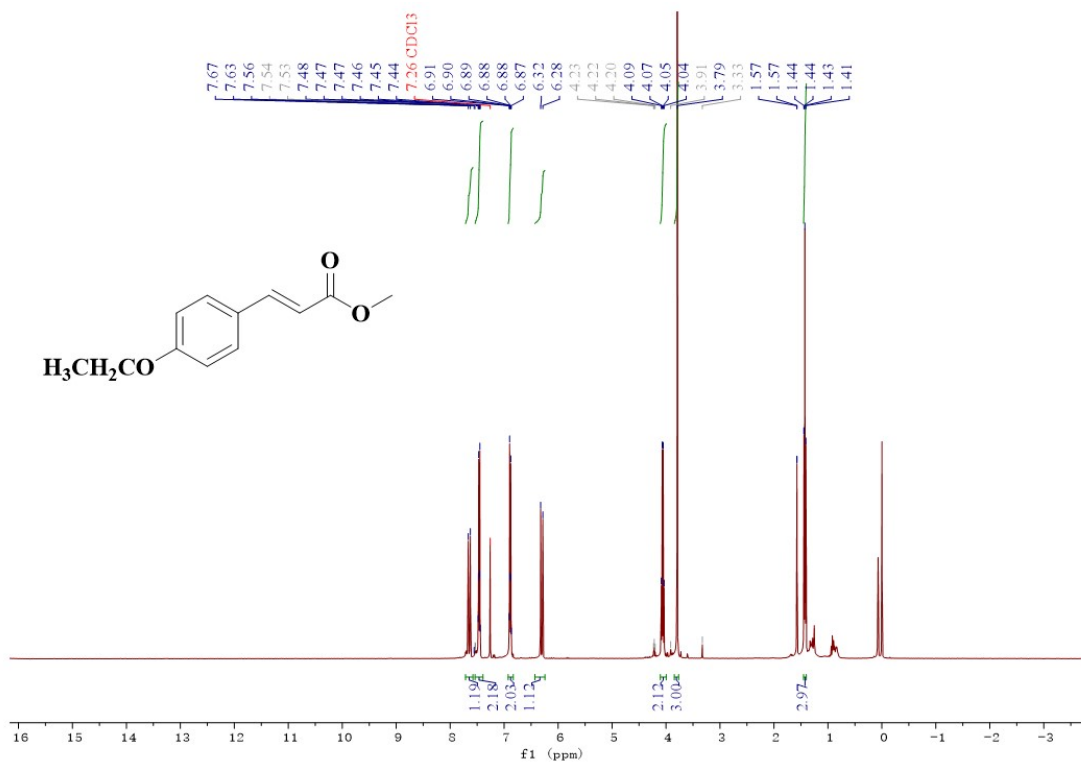

Fig. S12 <sup>1</sup>H NMR spectra of methyl 4-ethoxy cinnamate.

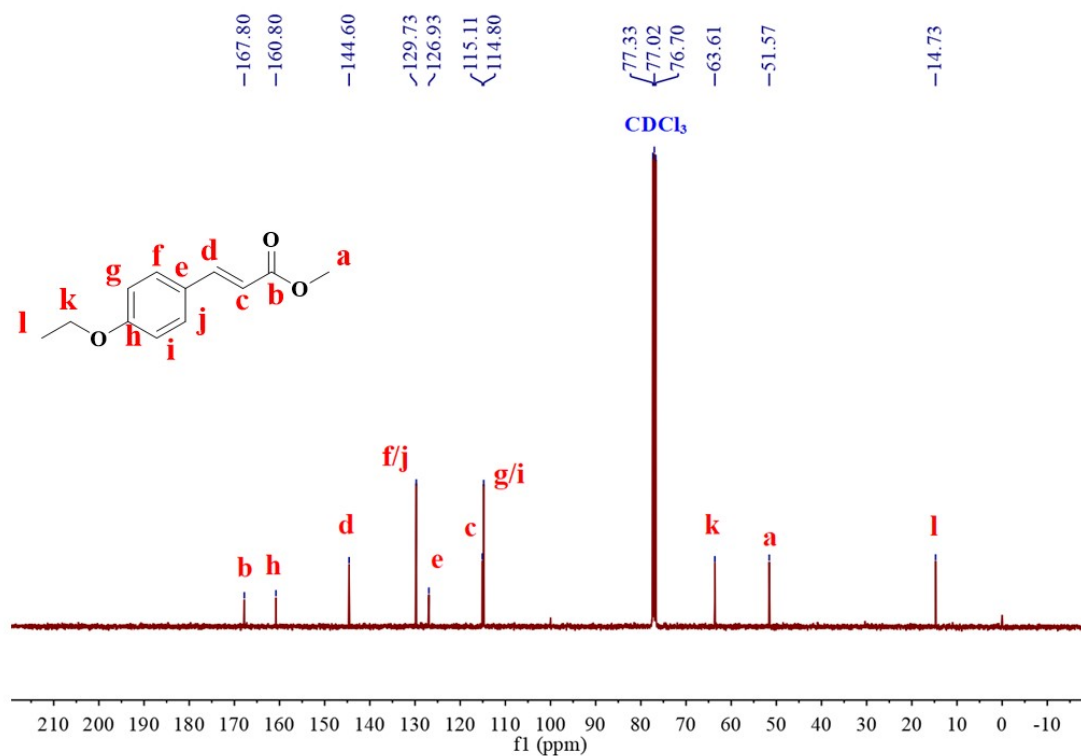

Fig. S13 <sup>13</sup>C NMR spectra of methyl 4-ethoxy cinnamate.

## Supporting Tables

**Table. S1** The weight percentage of Ag and Pd elements in samples was determined by ICP-AES.

| samples<br>elements | Fe <sub>3</sub> O <sub>4</sub> @Ag/PDA | Fe <sub>3</sub> O <sub>4</sub> @Pd/PDA | Fe <sub>3</sub> O <sub>4</sub> @AgPd/PDA<br>nanospheres | Fe <sub>3</sub> O <sub>4</sub> @AgPd/PDA<br>nanosnowman |
|---------------------|----------------------------------------|----------------------------------------|---------------------------------------------------------|---------------------------------------------------------|
| Ag                  | 12.2 wt%                               |                                        | 6.46 wt%                                                | 11.10 wt%                                               |
| Pd                  |                                        | 3.0 wt%                                | 4.59 wt%                                                | 6.89 wt%                                                |

**Table. S2** Comparison of the catalytic capacities of various catalysts reported in the literature for the reduction of 4-NP, MO, and MB by NaBH<sub>4</sub>.

| Organic<br>pollutants | Catalysts                                       | $k_n$ (min <sup>-1</sup> mg <sup>-1</sup> ) | References |
|-----------------------|-------------------------------------------------|---------------------------------------------|------------|
| 4-NP                  | kaolin-PDA-PdAg                                 | 0.3456                                      | 5          |
|                       | UiO-66/btb/Pd NPs                               | 2.943                                       | 6          |
|                       | MXene@AgPd@PDA                                  | 1.2                                         | 7          |
|                       | Ag-Co/CNF                                       | 1.032                                       | 8          |
|                       | Fe <sub>3</sub> O <sub>4</sub> @AgPd/PDA        | 5.95                                        | This work  |
|                       | Ag/ZIF-7                                        | 17.28                                       | 9          |
| MO                    | Fe <sub>3</sub> O <sub>4</sub> @polythiophen-Ag | 2.82                                        | 10         |
|                       | PdNPs/RGO-A                                     | 0.6                                         | 11         |
|                       | Pd/CCS-Per                                      | 1.4                                         | 12         |
|                       | Fe <sub>3</sub> O <sub>4</sub> @AgPd/PDA        | 26                                          | This work  |
|                       | ZBD@Ag                                          | 1.83                                        | 13         |
| MB                    | Ag@PDA NTs                                      | 3.191                                       | 14         |
|                       | Fe <sub>3</sub> O <sub>4</sub> @TA/Ag           | 2.06                                        | 15         |
|                       | 12%-Ag/MX/PAM                                   | 5.84                                        | 16         |
|                       | Fe <sub>3</sub> O <sub>4</sub> @AgPd/PDA        | 13.35                                       | This work  |

**Table. S3** Heck cross-coupling reactions with different substrates.

| Entry | Actant                                                                              | Product                                                                           | Conversion (%) | Selectivity (%) |
|-------|-------------------------------------------------------------------------------------|-----------------------------------------------------------------------------------|----------------|-----------------|
| 1.    | 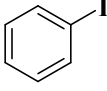   |  | 99             | >99.8           |
| 2.    |    |  | 99.6           | >99.9           |
| 3.    |    |  | 98.7           | >99.9           |
| 4.    |    |  | 95.4           | >99.9           |
| 5.    |  | –                                                                                 | –              | –               |
| 6.    |  | –                                                                                 | –              | –               |

Reaction conditions: aryl iodide 1 mmol, methyl acrylate 2 mmol, Fe<sub>3</sub>O<sub>4</sub>@AgPd/PDA catalyst 5 mg, triethylamine (Et<sub>3</sub>N) 2 mmol, DMF 5 mL, 100 °C, 5 h.

## References

1. W. Cheng, K. Tang, Y. Qi, J. Sheng and Z. Liu, *Journal of Materials Chemistry*, 2010, **20**, 1799-1805.
2. A. Feng, Y. Yu, Y. Wang, F. Jiang, Y. Yu, L. Mi and L. Song, *Materials & Design*, 2017, **114**, 161-166.
3. Q. Xiong, Q. Fang, K. Xu, G. Liu, M. Sang, Y. Xu, L. Hao and S. Xuan, *Dalton Transactions*, 2021, **50**, 14235-14243.
4. P. A. Bazuła, P. M. Arnal, C. Galeano, B. Zibrowius, W. Schmidt and F. Schüth, *Microporous and Mesoporous Materials*, 2014, **200**, 317-325.
5. D. Gan, Z. Wang, X. Li, J. Zhou, B. Dai, L. Yang and S. Xia, *Applied Clay Science*, 2023, **244**, 107091.
6. Z. Kiani, R. Zhiani, S. Khosroyar, A. Motavalizadehkakhky and M. Hosseiny, *Inorganic Chemistry Communications*, 2021, **124**, 108382.
7. J. Jin, S. Wu, J. Wang, Y. Xu, S. Xuan and Q. Fang, *Dalton Transactions*, 2023, **52**, 2335-2344.
8. V. K. Landge, S. H. Sonawane, S. Manickam, G. U. Bhaskar Babu and G. Boczkaj, *Journal of Environmental Chemical Engineering*, 2021, **9**, 105719.
9. A. Malik and M. Nath, *Journal of Environmental Chemical Engineering*, 2020, **8**, 104547.
10. M. S. Najafinejad, P. Mohammadi, M. Mehdi Afsahi and H. Sheibani, *Journal of Molecular Liquids*, 2018, **262**, 248-254.
11. M. Hashemi Salehi, M. Yousefi, M. Hekmati and E. Balali, *Applied Organometallic Chemistry*, 2019, **33**.
12. Z. Farrokhi, S. Sadjadi, F. Raouf and N. Bahri Laleh, *Inorganic Chemistry Communications*, 2022, **143**, 109734.
13. A. Lajevardi, M. Tavakkoli Yaraki, A. Masjedi, A. Nouri and M. Hossaini Sadr, *Journal of Molecular Liquids*, 2019, **276**, 371-378.
14. J. Lu, J. Fang, J. Li, C. Wang, Z. He, L. Zhu, Z. Xu and H. Zeng, *ACS Applied Nano Materials*, 2019, **3**, 156-164.
15. H. Veisi, S. B. Moradi, A. Saljooqi and P. Safarimehr, *Materials Science and*

*Engineering: C*, 2019, **100**, 445-452.

16. C. Peng, Z. Kuai, X. Li, S. Lian, D. Jiang, J. Tang, L. Li, R. Wu, A. Wu and S. Chen, *Materials & Design*, 2021, **210**, 110061.
